# Supplementary material for: N4-Hydroxycytidine/molnupiravir inhibits RNA virus-induced encephalitis by producing less fit mutated viruses
Source: PubMed Central journal article supplement (PMC11493283; doi:10.1371/journal.ppat.1012574), 2024-09-30
Supplement: ppat.1012574.s001.pdf [file ppat.1012574.s001.pdf]

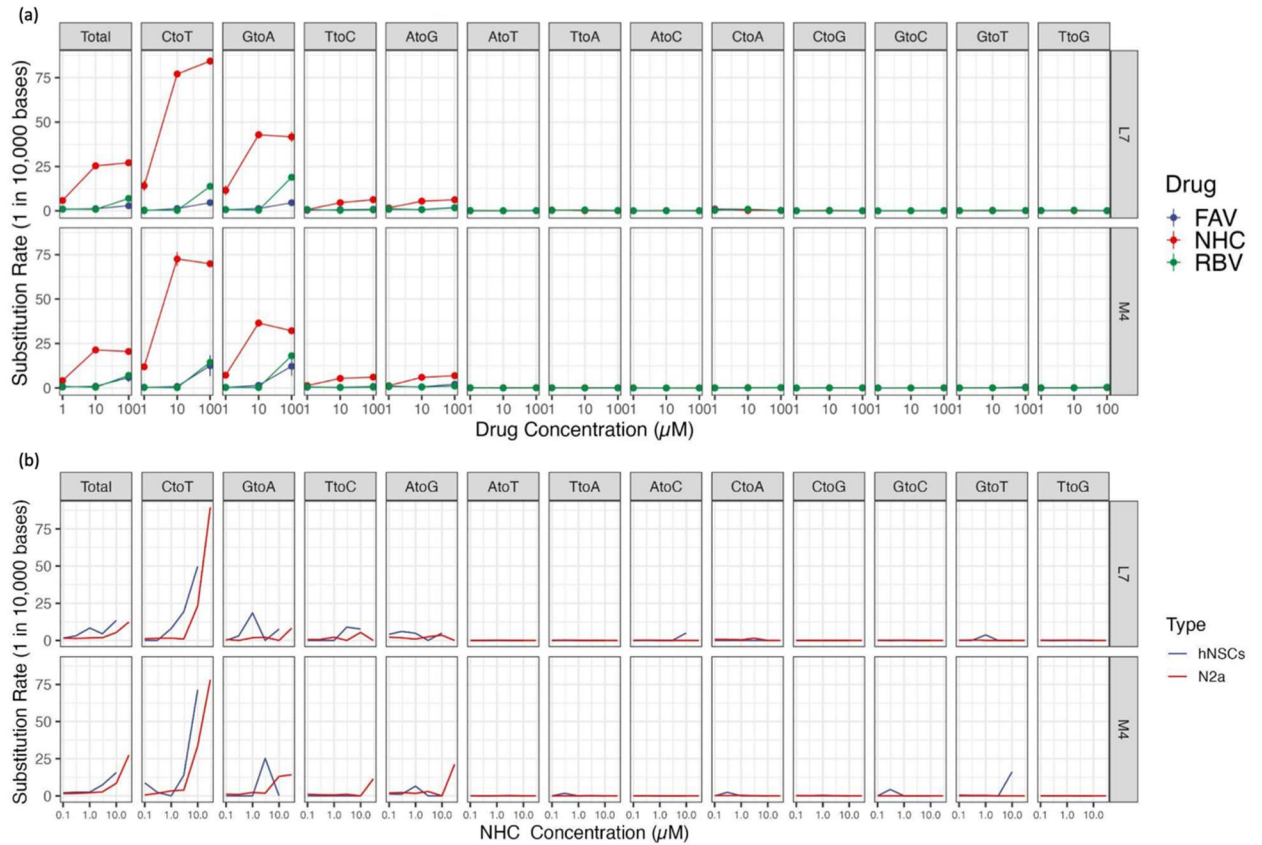

**Supplemental Fig. 1.** Mechanism of action of NHC, RBV and FAV in cell models. (A) Substitution rate measured by MPID-NGS in the LACV Vero cell model. (B) Substitution rate measured by MPID-NGS in the LACV Na2 and hNSCs models.
